# Supplementary material for: Clozapine protects adult neural stem cells from ketamine-induced cell death in correlation with decreased apoptosis and autophagy
Source: PubMed Central journal article supplement (PMC6981094; doi:10.1042/bsr20193156), 2020-01-24
Supplement: BSR-2019-3156_supp.pdf [file BSR-2019-3156_supp.pdf]

**A**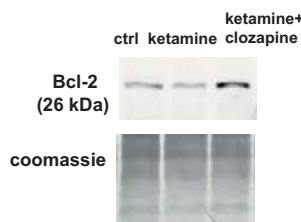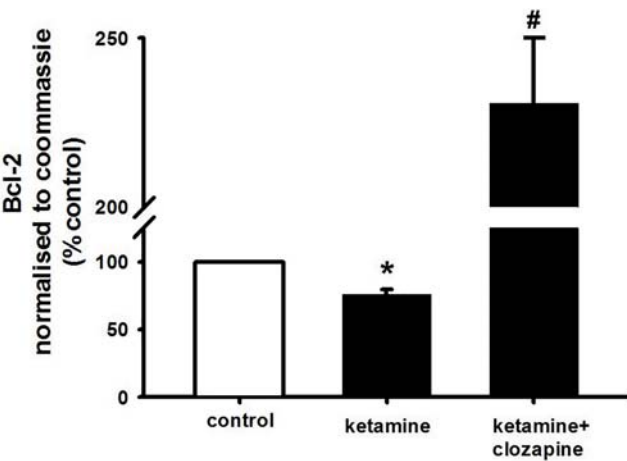**B**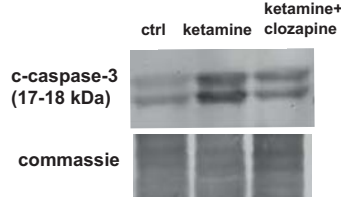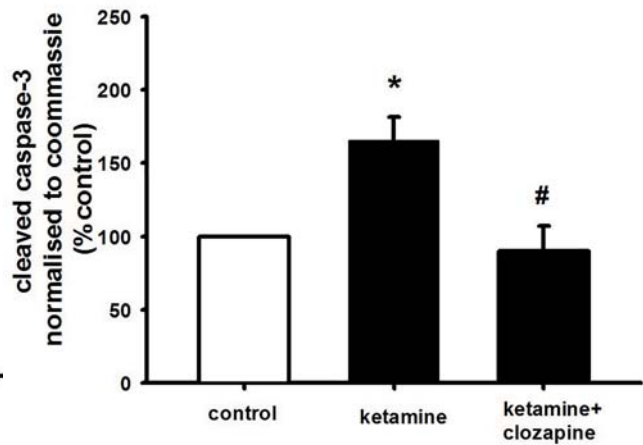

**Suppl Fig.1 Clozapine counteracts ketamine-induced cell death in correlation with decreased apoptosis.** NSCs were plated as single cells. Cells were treated with 400  $\mu$ M ketamine and 10 nM clozapine for 24 hours. After 24 hours incubation cells harvested for Western blot experiments. To obtain quantitative measurements **(A)** Bcl-2 protein levels and **(B)** cleaved caspase 3 and were normalized against Coomassie blue. Data are shown as mean  $\pm$ SEM (A, n=5-6; B, n=4-5). Kruskal-Wallis followed by Dunn's test was used. Differences were considered significant at P <0.05. \*denotes P <0.05 compared with control, # denotes P<0.05 compared to ketamine.
